# Supplementary material for: A Novel Method for Primary Blood Cell Culturing and Selection in Drosophila melanogaster
Source: MDPI journal article supplement (doi:10.3390/cells12010024), 2022-12-21

Table S1

| Abbreviation                                | Genotype                                                                          | Source                                                                                                                                                                                      |
|---------------------------------------------|-----------------------------------------------------------------------------------|---------------------------------------------------------------------------------------------------------------------------------------------------------------------------------------------|
| <i>Me</i>                                   | <i>w,msnF9MO-Cherry,eater-GFP</i>                                                 | Reporters generated in Tokusumi et al., 2009 [38], combined in Anderl et al., 2016 [21]                                                                                                     |
| <i>Me; l(3)mbn<sup>1</sup>/TM6,Tb</i>       | <i>w,msnF9MO-Cherry,eater-GFP; l(3)mbn<sup>1</sup>/TM6,Tb</i>                     | Generated from combining <i>Me</i> with <i>l(3)mbn<sup>1</sup>/TM6,Tb</i> (Konrad et al., 1994 [42])                                                                                        |
| <i>Me,hop<sup>Tum</sup></i>                 | <i>w,msnF9MO-Cherry,eater-GFP,hop<sup>Tum-1</sup></i>                             | Generated from combining <i>Me</i> with a homozygous viable <i>hop<sup>Tum</sup></i> strain (BDSC#8492)                                                                                     |
| <i>Me; UAS-Pvrλ</i>                         | <i>w,msnF9MO-Cherry,eater-GFP; UAS-Pvrλ</i>                                       | Generated from combining <i>Me</i> with <i>UAS-Pvrλ</i> (Duchek et al., 2001 [87])                                                                                                          |
| <i>Hml-Gal4 (R3-Hml-Gal4)</i>               | <i>w; Hml-Gal4.A,UAS-2XEGFP</i>                                                   | Honti et al., 2014 [4]                                                                                                                                                                      |
| <i>crq&gt;Act&gt;Gal4</i>                   | <i>y,w,UAS-FLP; crq-Gal4, Act5C-FRT-y<sup>+</sup>-FRT GAL4,UAS-GFP</i>            | Honti et al., 2010 [23]                                                                                                                                                                     |
| <i>lz-Gal4</i>                              | <i>y,w,lz-Gal4,UAS-GFP</i>                                                        | A gift from Bruno Lemaitre, EPFL Lausanne                                                                                                                                                   |
| <i>msnCherry; atilla<sup>minos</sup>GFP</i> | <i>w,msnF9MO-Cherry; Mi{ETI}atilla<sup>MB03539</sup></i>                          | Generated from combining <i>msnCherry</i> and <i>atilla<sup>minos</sup>GFP</i> (Honti et al., 2009 [37])                                                                                    |
| <i>msn&gt;GFP</i>                           | <i>w, UAS-mCD8::GFP; msn-Gal4</i>                                                 | Generated from crossing <i>msn-GAL4</i> (Lam et al., 2010 [88], a gift from Professor Dan Hultmark, Umea University) to <i>UAS-mCD8GFP</i> (a gift from József Mihály, BRC Szeged)          |
| <i>Cg&gt;FUCCI</i>                          | <i>w; Cg-Gal4; UAS-EGFP::E2F1<sup>1-230</sup>,UAS-mRFP1::CycB<sup>1-266</sup></i> | Generated from combining <i>Cg-Gal4</i> (BDSC#7011) with <i>UAS-FlyFUCCI</i> (Zielke et al., 2014 [44], BDSC#55122)                                                                         |
| <i>Hml-DsRed</i>                            | <i>W; HmlADsRed.nls</i>                                                           | Makhijani et al., 2011 [15]                                                                                                                                                                 |
| <i>UAS-BsdR</i>                             | <i>w; UAS-BsdR{attP40}</i>                                                        | Generated in this study                                                                                                                                                                     |
| <i>vas-int; attP40</i>                      | <i>y w M(eGFP, vas-int, dmRFP)ZH-2A; P{CaryP}attP40</i>                           | Fly Facility, Department of Genetics, University of Cambridge ( <a href="https://www.ncbi.nlm.nih.gov/pmc/articles/PMC1805588/">https://www.ncbi.nlm.nih.gov/pmc/articles/PMC1805588/</a> ) |

Figure S1

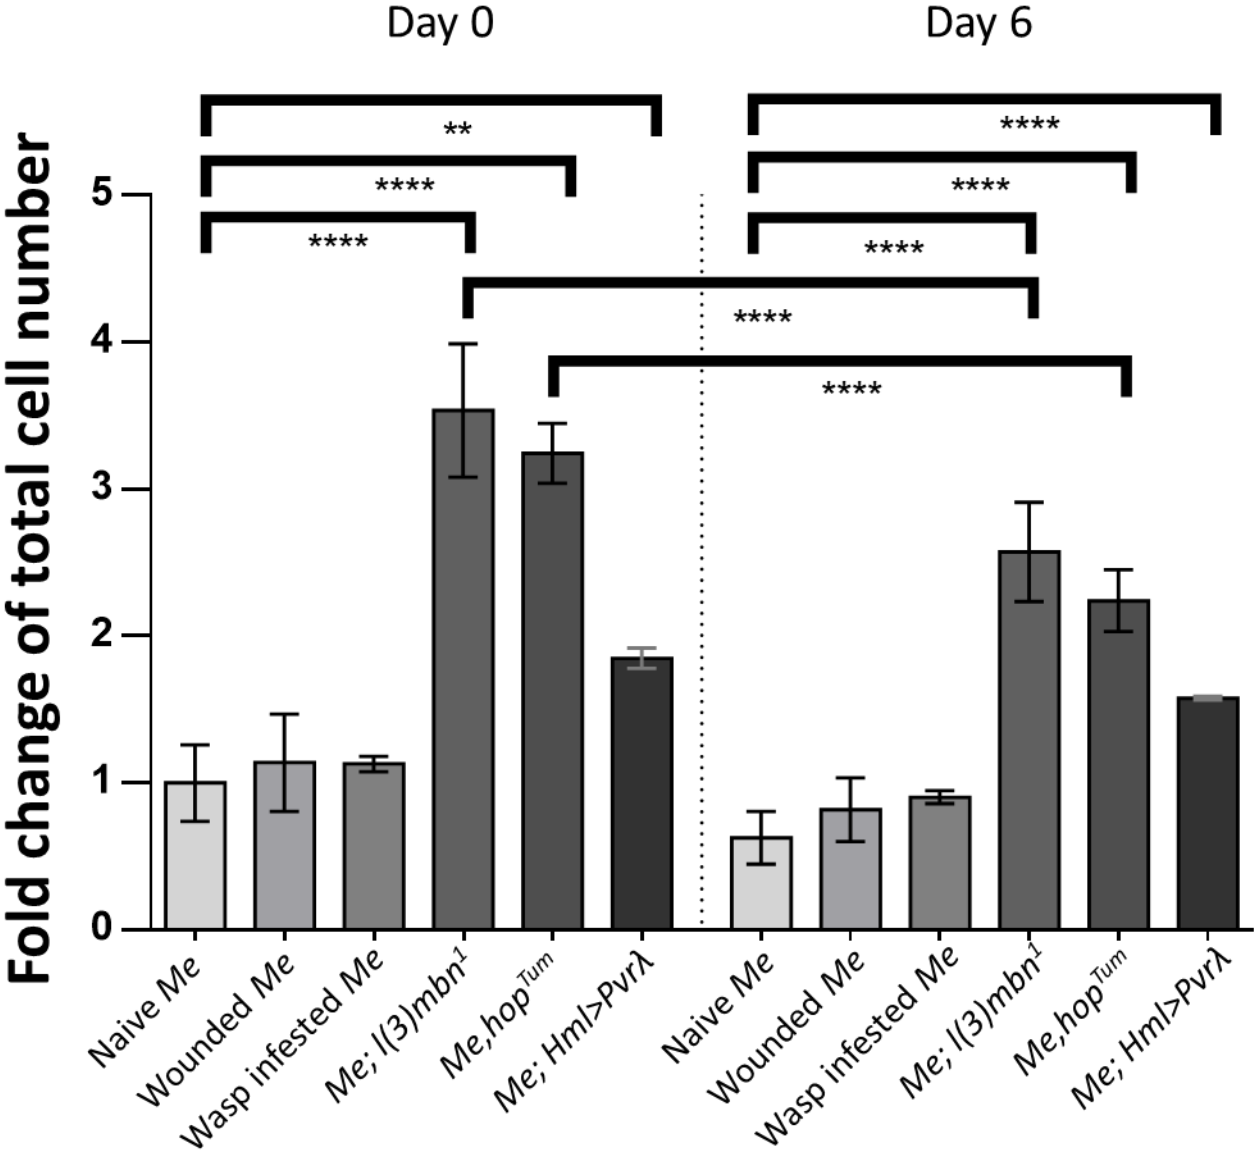

Figure S2

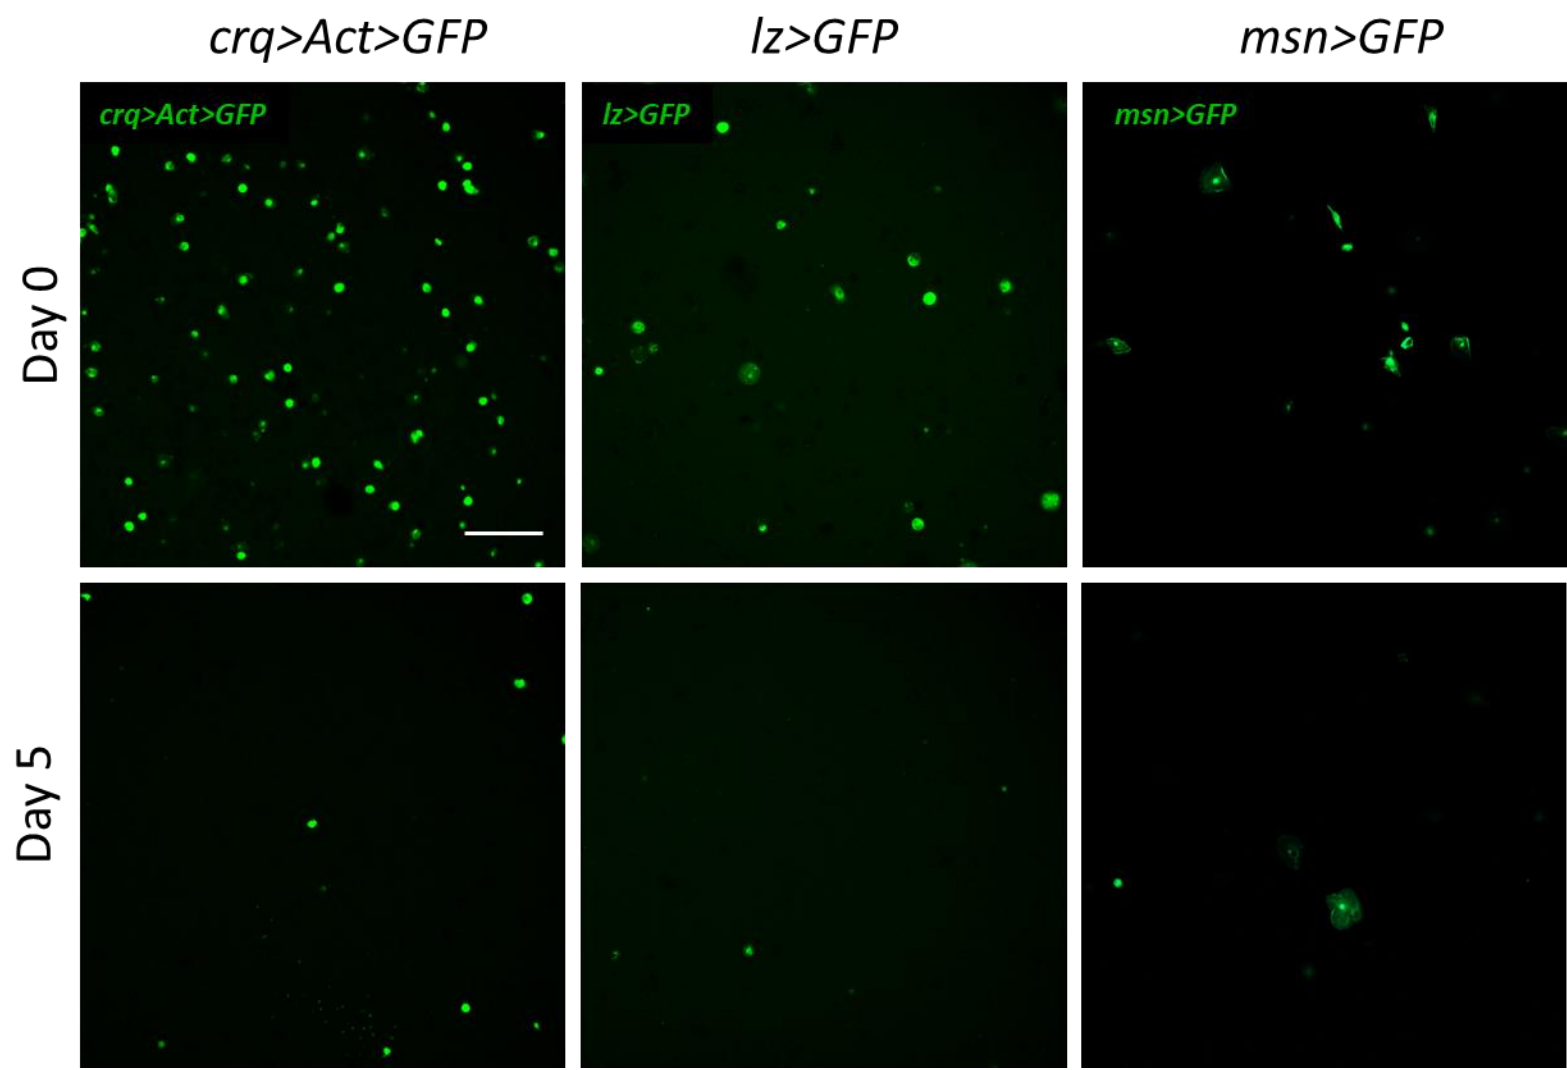

Supplement: s1 [file s1]
